# Supplementary material
Source: publisher figshare collection journal article supplement (https://acs.figshare.com/ndownloader/files/4713655)
Supplement: Supplementary file 1 [file 4713655]

Supporting Information

**Table S1**. Hydrogen Bonds for Complex **1**. [O(5-7) are Boric Acid Oxygens, O(1w) Aquo Ligand, O(2w) and O(3w) Lattice Water Molecules]

| D-H | d(D-H) | d(H..A) | <(DHA) | d(D..A) | A |
| --- | --- | --- | --- | --- | --- |
| O(5)-H(51) | 0.775(17) | 1.949(17) | 179(3) | 2.724(2) | O(4) |
| O(6)-H(61) | 0.836(17) | 1.85(2) | 157(3) | 2.638(2) | O(2w'') |
| O(7)-H(71) | 0.799(17) | 2.03(2) | 160(3) | 2.797(3) | O(1w''') |
| O(1w)-H(11) | 0.896(16) | 1.91(2) | 139.9(18) | 2.660(2) | O(2) |
| O(1w)-H(12) | 0.844(17) | 1.933(19) | 158(3) | 2.734(3) | O(3w') |
| O(2w)-H(21) | 0.815(18) | 1.929(19) | 168(4) | 2.732(2) | O(1) |
| O(2w)-H(22) | 0.847(18) | 2.03(2) | 152(3) | 2.805(3) | O(6) |
| O(3w)-H(31) | 0.855(17) | 1.986(18) | 171(4) | 2.834(3) | O(5) |
| O(3w)-H(32) | 0.828(17) | 1.968(17) | 174(3) | 2.793(2) | O(2*) |

Symmetry code: (') x+1, y+1, z; ('') –x+1, –y+1, –z+1; (''') x–1, y–1, z; (*)1–x, 1–y, –z.

**Table S2**. Hydrogen Bonds For Complex **5**

| D-H | d(D-H) | d(H..A) | <(DHA) | d(D..A) | A |
| --- | --- | --- | --- | --- | --- |
| O(1w)-H(1a) | 0.73(4) | 2.15(4) | 177(5) | 2.870(3) | O(4') |
| O(1w)-H(2a) | 0.73(4) | 2.04(4) | 152(5) | 2.700(3) | O(2) |
| O(2w)-H(3a) | 0.79(5) | 2.22(5) | 165(5) | 2.991(3) | O(3) |
| O(2w)-H(4a) | 0.85(5) | 2.16(5) | 153(4) | 2.937(4) | O(2'') |

Symmetry code: (') x–1, y, z; ('') –x+1, –y+1, –z.

**Table S3**. Hydrogen Bonds for Complex **7**

| D-H | d(D-H) | d(H..A) | <(DHA) | d(D..A) | A |
| --- | --- | --- | --- | --- | --- |
| O(1w)-H(11w) | 0.97(8) | 2.05(4) | 144(16) | 2.895(6) | O(5) |
| O(1w)-H(12w) | 0.91(6) | 2.01(3) | 160(22) | 2.889(7) | O(2w) |
| O(2w)-H(21w) | 0.90(2) | 2.13(8) | 144(11) | 2.904(5) | O(7) |
| O(2w)-H(22w) | 0.90(2) | 2.03(3) | 164(9) | 2.905(8) | F(4') |
| O(3w)-H(31w) | 0.91(2) | 2.22(8) | 135(9) | 2.928(8) | F(2) |
| O(3w)-H(32w) | 0.91(2) | 2.00(2) | 141(4) | 2.772(7) | O(1w) |

Symmetry code: (') x+1, y, z.


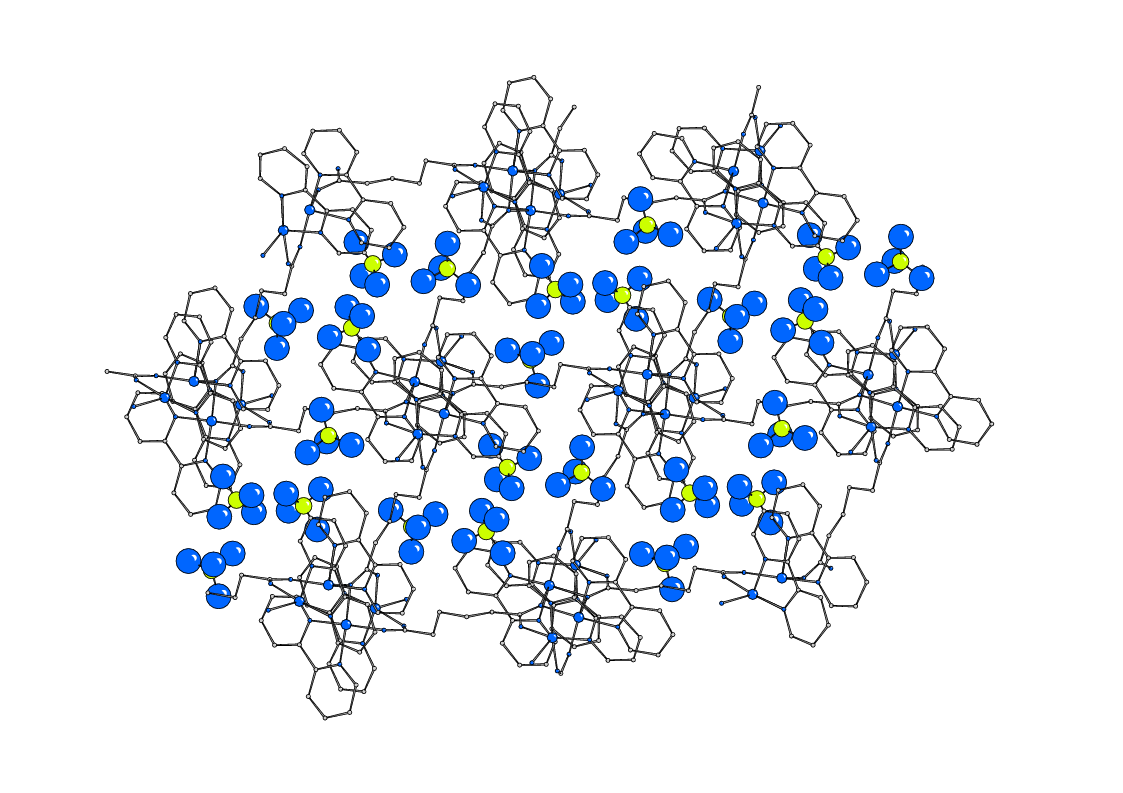


**Figure S1.** A ball and stick representation of the 2D network of **6** in the [001] direction showing the channels occupied by perchlorate anions.


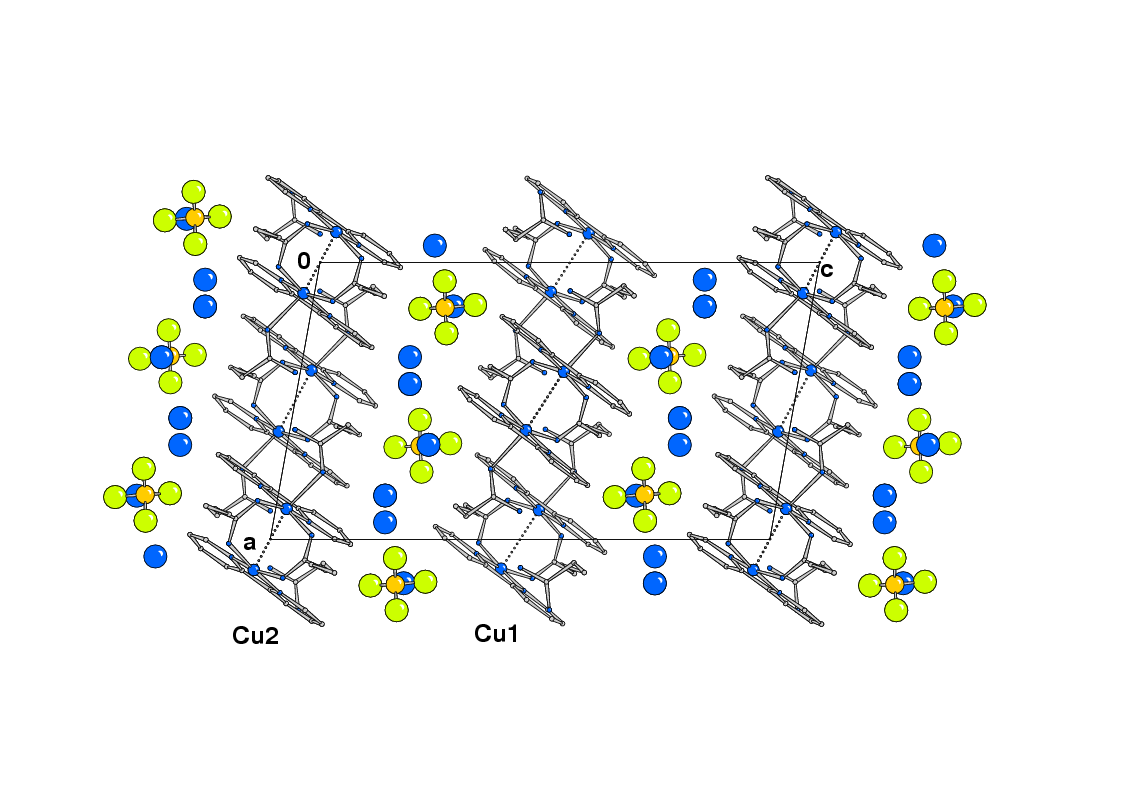


**Figure S2.** Crystal packing along axis *b* showing the BF4¯ anions and water molecules inserted between the [Cu(bpy)(adipate)]n layers of **7**.


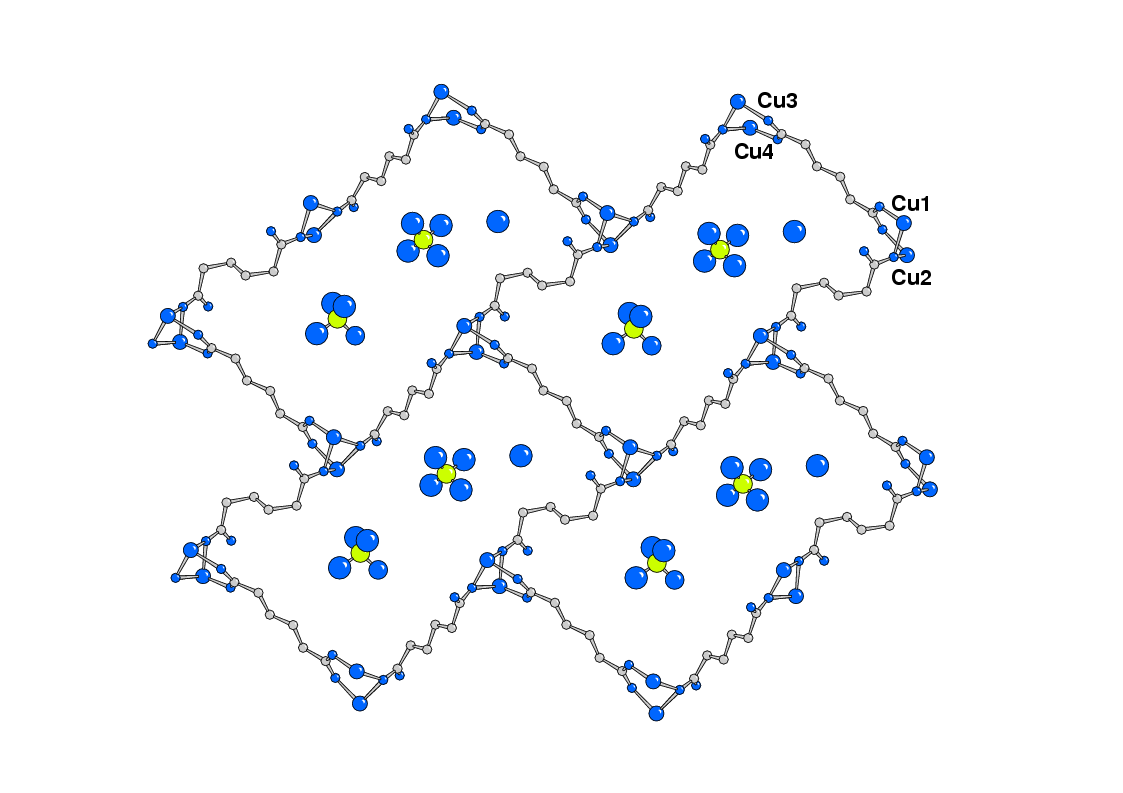


**Figure** **S3.** The 2D layered structure of **8** viewed down axis *c* showing the brick-wall architecture with voids occupied by perchlorate anions and lattice water molecules (phen ligands are not shown for clarity).

**Figure S4.** Plot of the *MT* *vs* *T* for **5.** Solid line indicates the best fit. Inset: plot of the reduced magnetization (*M/N*) for **5**. Solid line corresponds to Brillouin law.

**Figure S5.** (A) Plot of the *M vs* *T* for **3**;(B) plot of the *MT* *vs* *T* for **3** (Solid line indicates the best fit).

**Figure S6.** Plot of the *MT* *vs* *T* for **8** (solid line indicates the best fit). Inset: plot of the reduced magnetization (*M/N*) for **8**.

**Figure S7**. (A) Plot of the *MT* *vs* *T* for **7**. (B) Plot of the reduced magnetization (*M/N*) for **7**.


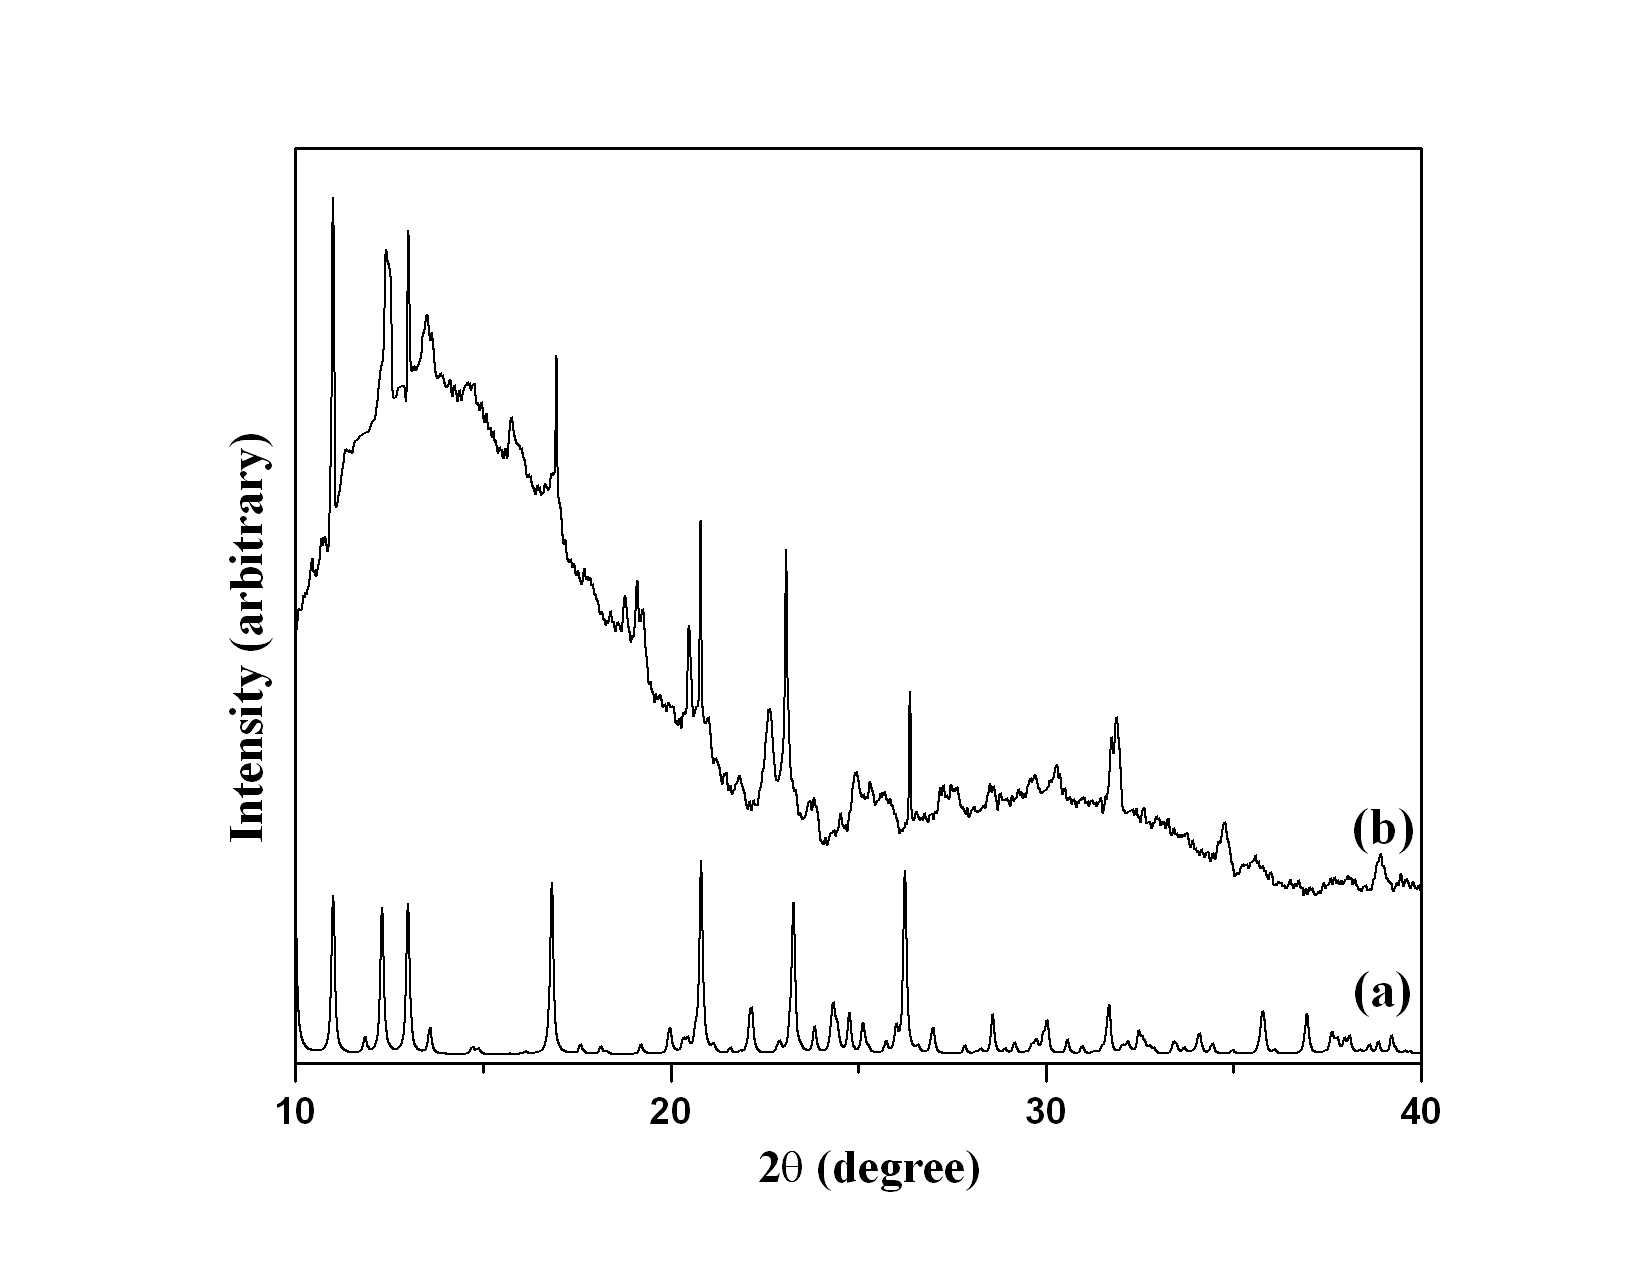


**Figure S8**. X-ray powder pattern of complex **7** (a) simulated powder pattern from X-ray single crystal data; (b) as synthesized.
